# Supplementary material for: Distinct Influences of Land Cover and Land Management on Seasonal Climate
Source: PubMed Central journal article supplement — J Geophys Res Atmos. 2018 Nov 10;123(21):12017–39. doi: 10.1029/2018JD028874 (PMC6360509; doi:10.1029/2018jd028874), 2018-11-10
Supplement: JGRD-123-12017-s001.pdf [file JGRD-123-12017-s001.pdf]

**“Distinct influences of land-cover and land-management on seasonal  
climate”**

<sup>1,2\*,+</sup>Deepti Singh, <sup>3,4\*</sup>Sonali P. McDermid, <sup>1,4</sup>Benjamin I. Cook, <sup>4,5</sup>Michael J. Puma,  
<sup>4,5</sup>Larissa Nazarenko, and <sup>4</sup>Maxwell Kelley

<sup>1</sup>Lamont-Doherty Earth Observatory, Columbia University, Palisades, New York, USA

<sup>2</sup> Washington State University, Vancouver, WA, USA

<sup>3</sup>New York University, New York, USA

<sup>4</sup>NASA Goddard Institute for Space Studies, New York, NY

<sup>5</sup>Center for Climate Systems Research, Earth Institute, Columbia University, New York,  
USA

**Contents of this file**

Figures S1-S5

**Figure S1.** (a) Dominant natural land-cover type. (b) Fraction of grid cell with crop cover in year 2000 based on a dataset developed by Pongratz et al. (2008) and Hurtt et al. (2011).

**Figure S2.** Changes in seasonal temperature in the agricultural land-cover change experiment relative to the natural vegetation experiment (Crops - Natural Vegetation) and the agricultural land-cover change with added irrigation experiment relative to the land-cover change experiment (Irrigated Crops - Crops).

**Figure S3.** Same as in Fig. S2 but for seasonal precipitation

**Figure S4.** Same as in Fig. S2 but for percent change in cloud cover

**Figure S5.** Winter season climatology and changes in zonally-averaged winds across South Asia (70-90°E; see grey box in Fig. 10a) in the agricultural land-cover change experiment relative to the natural vegetation experiment (Crops - Natural Vegetation) and the agricultural land-cover change with added irrigation experiment relative to the land-cover change experiment (Irrigated Crops - Crops).

### (a) ModelE2 Dominant Vegetation Type

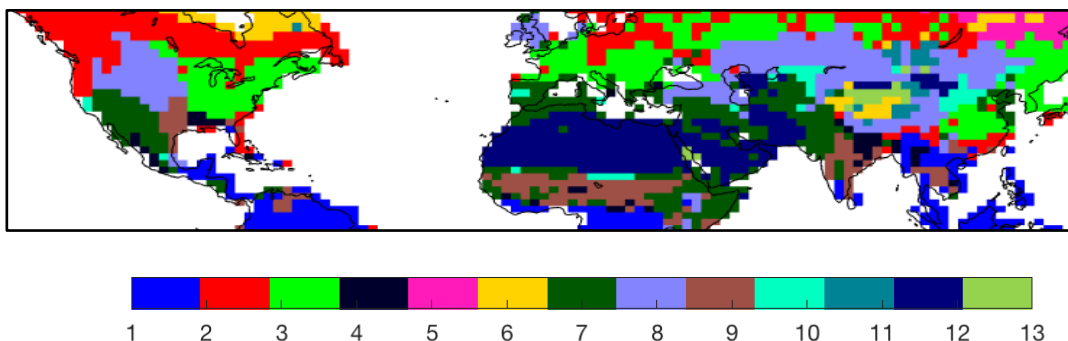

- |                                |                       |
|--------------------------------|-----------------------|
| 1. Evergreen Broadleaf         | 7. Arid Adapted Shrub |
| 2. Evergreen needleleaf        | 8. C3 Grass Perennial |
| 3. Cold deciduous broadleaf    | 9. C4 Grass Perennial |
| 4. Drought deciduous broadleaf | 10. C3 Grass Annual   |
| 5. Deciduous Needleleaf        | 11. C3 Grass Arctic   |
| 6. Cold Adapted Shrub          | 12. Bare bright soil  |
|                                | 13. Bare dark soil    |

### (b) Fractional crop cover

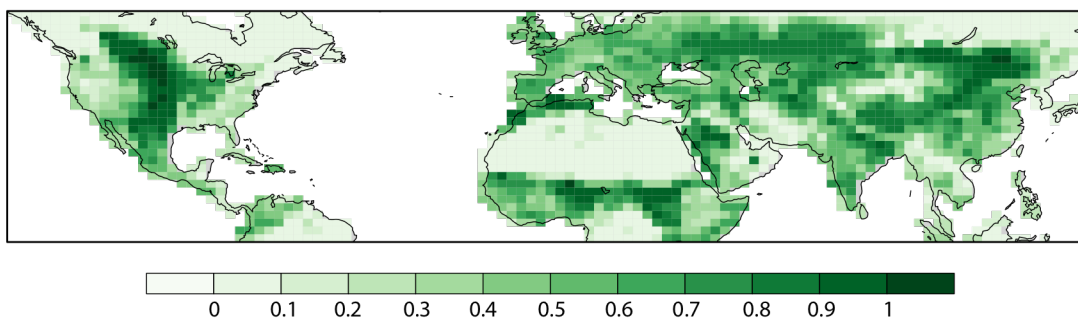

Figure S1. (a) Dominant natural land-cover type. (b) Fraction of grid cell with crop cover in year 2000 based on a dataset developed by Pongratz et al. (2008) and Hurtt et al. (2011).

### Crops - Natural Vegetation

### IrrigatedCrops - Crops

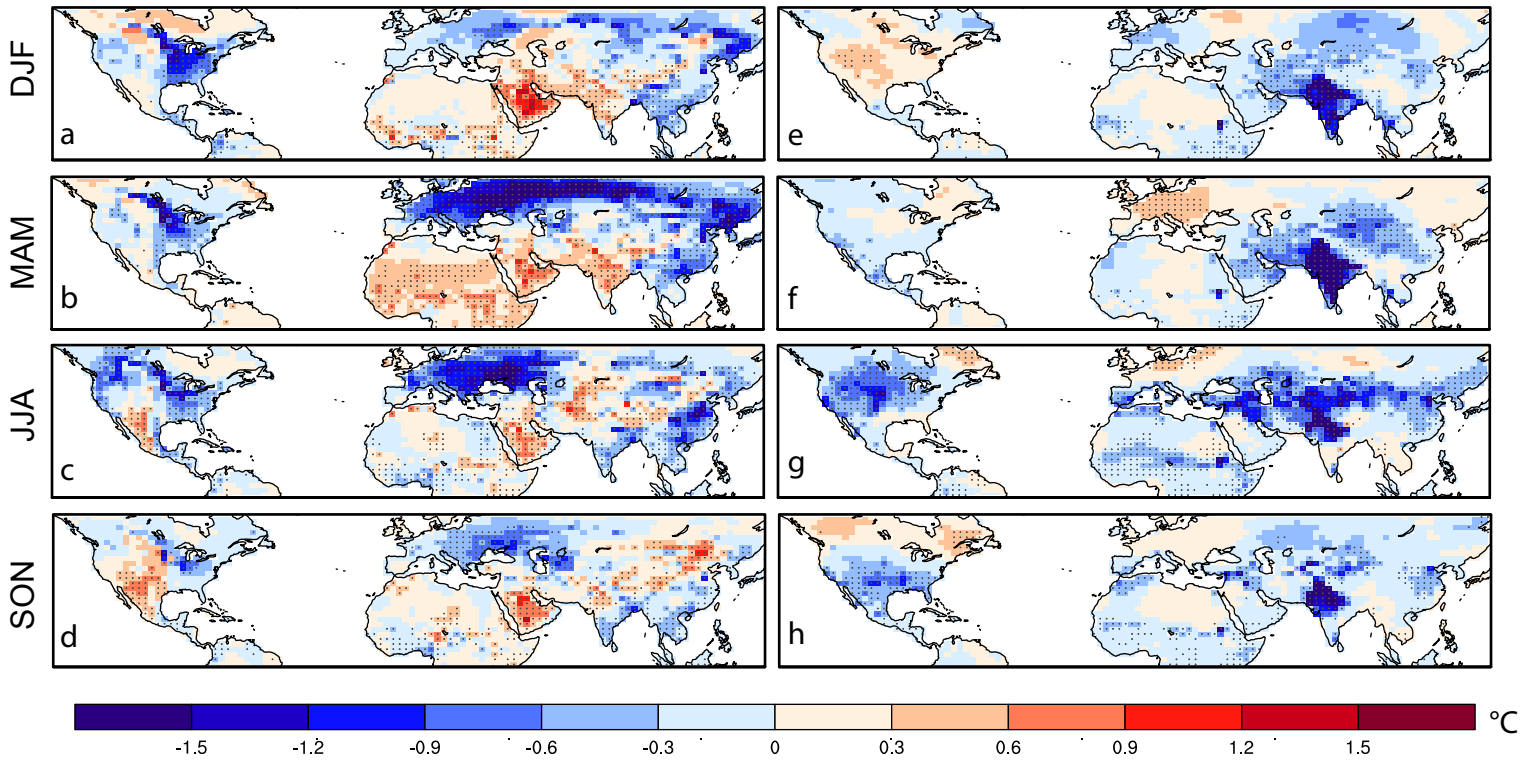

Figure S2. Changes in seasonal temperature in the agricultural land-cover change experiment relative to the natural vegetation experiment (Crops - Natural Vegetation) and the agricultural land-cover change with added irrigation experiment relative to the land-cover change experiment (Irrigated Crops - Crops).

### Crops - Natural Vegetation

### IrrigatedCrops - Crops

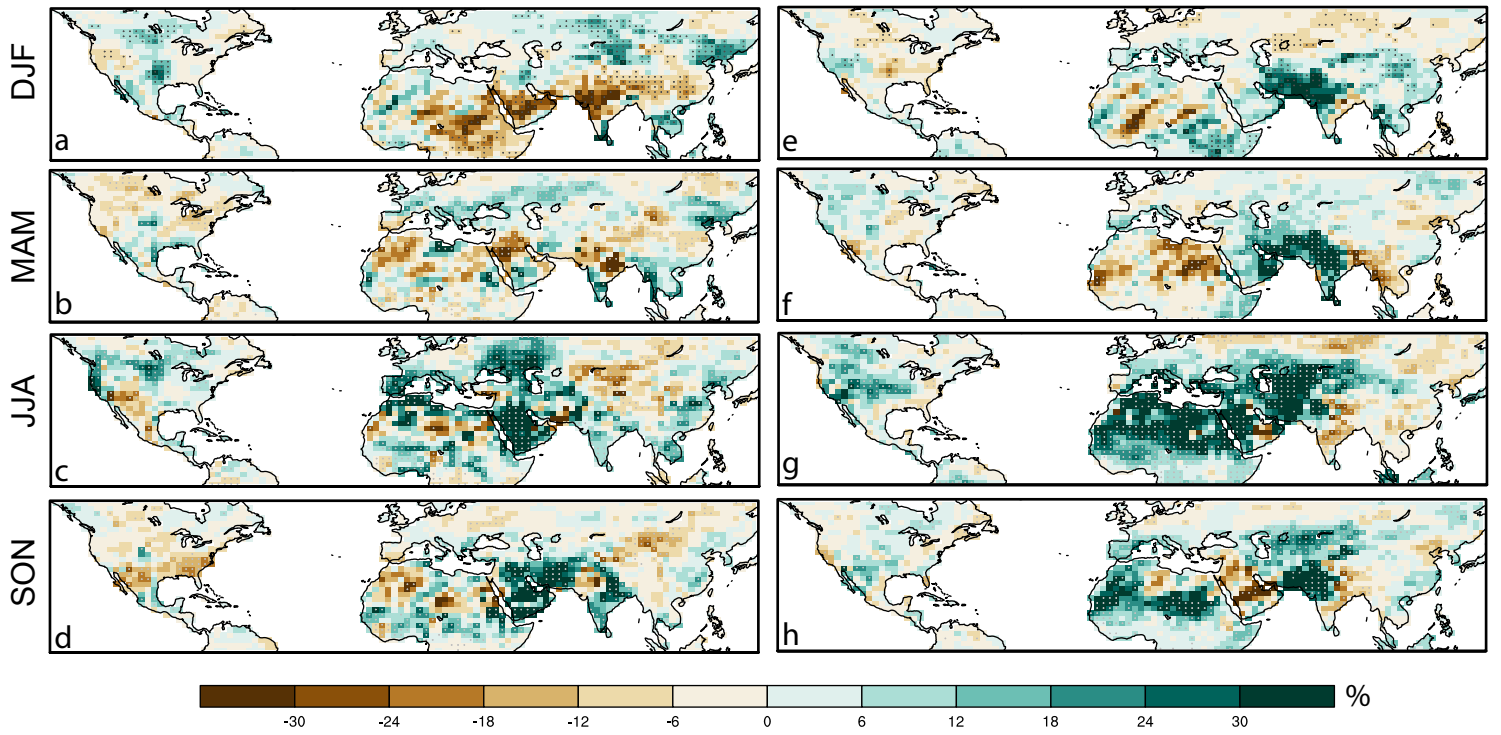

Figure S3. Same as in Fig. S2 but for seasonal precipitation.

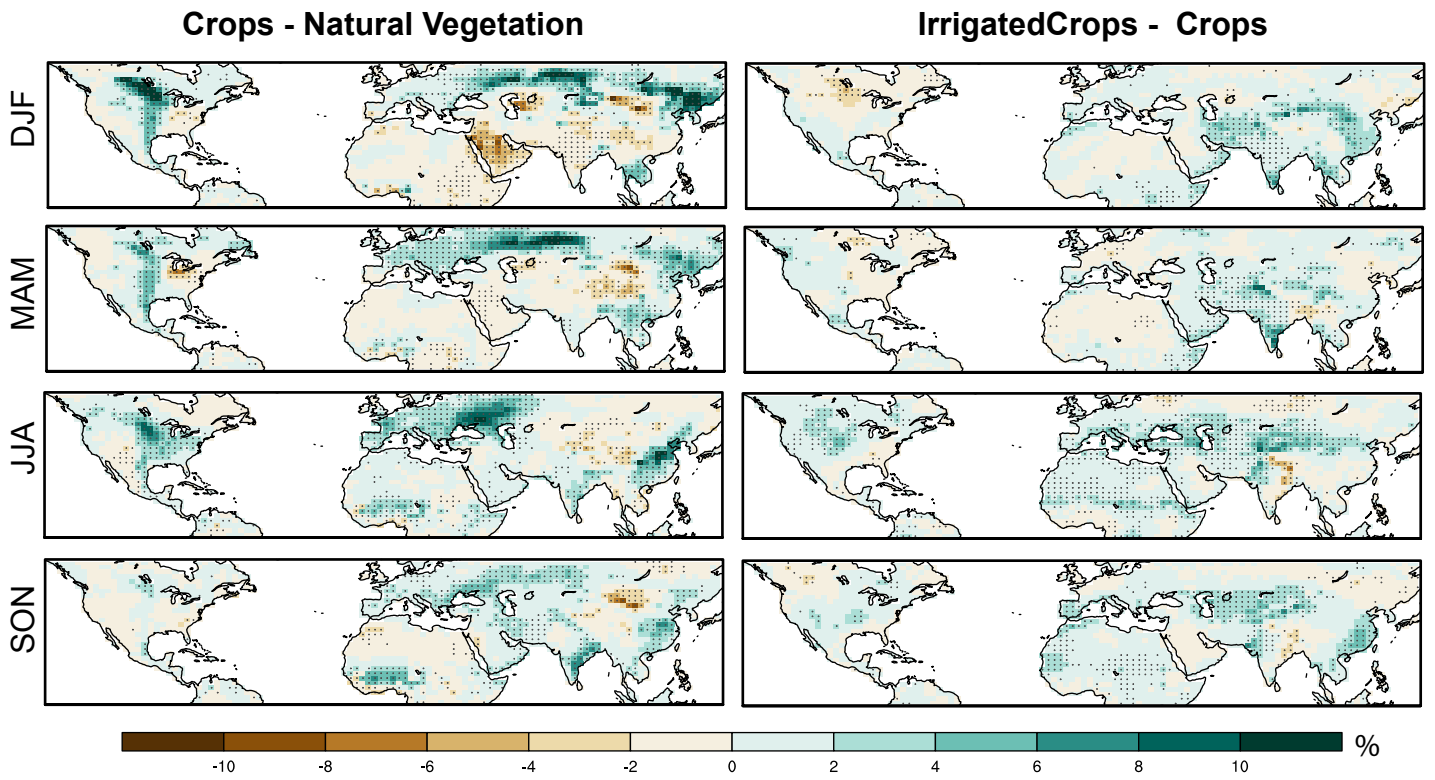

Figure S4. Same as in Fig. S2 but for percent change in cloud cover

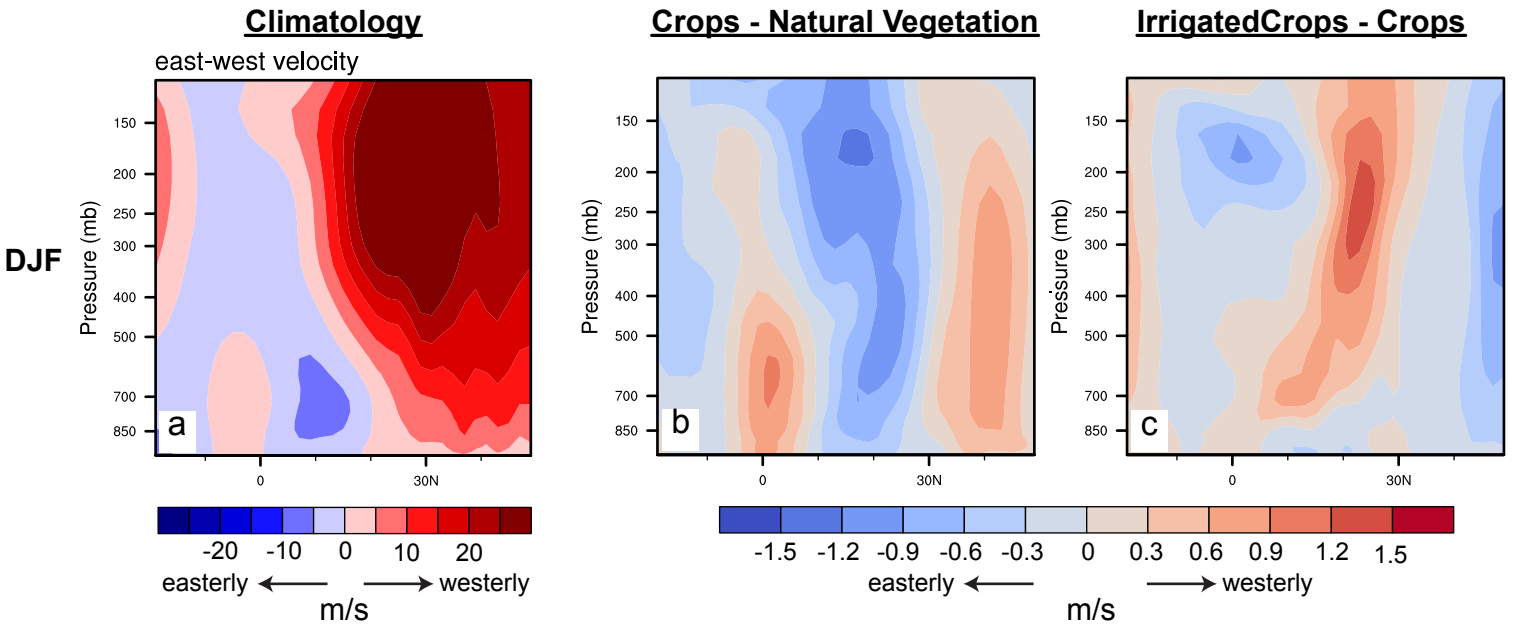

Figure S5. Winter season climatology and changes in zonally-averaged winds across South Asia (70-90°E; see grey box in Fig. 10a) in the agricultural land-cover change experiment relative to the natural vegetation experiment (Crops - Natural Vegetation) and the agricultural land-cover change with added irrigation experiment relative to the land-cover change experiment (Irrigated Crops - Crops).
